# Supplementary material
Source: PubMed Central journal article supplement (PMC5764801)
Supplement: NIHMS922193-supplement-2.pdf [file NIHMS922193-supplement-2.pdf]

**Figure 2. CONSORT Flow diagram of study enrollment and exclusion criteria**

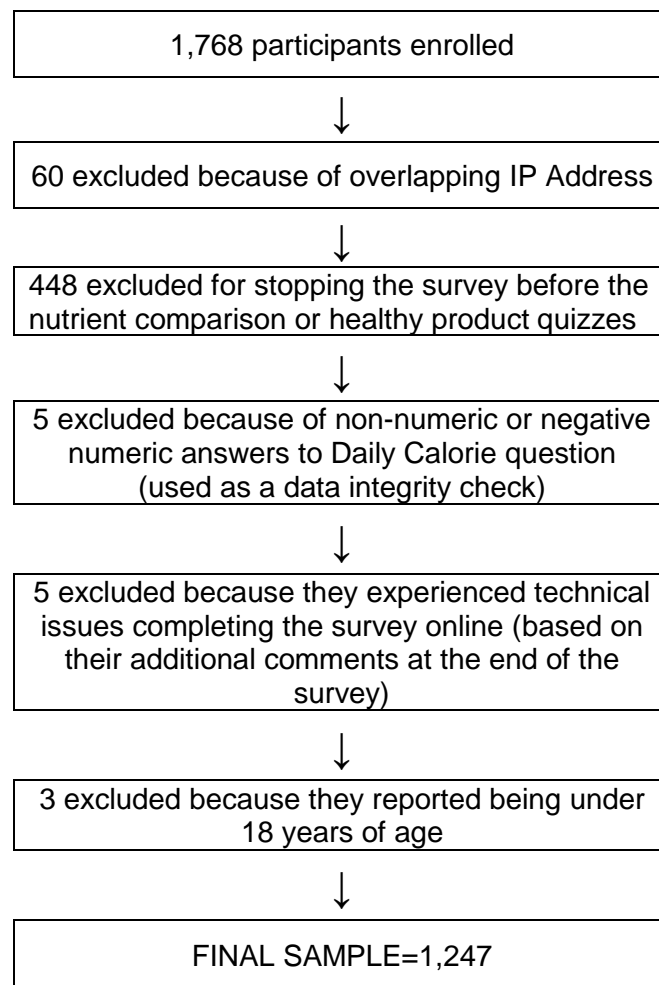

Internet survey of 1,247 adults, conducted June–July 2013.
