# Supplementary material
Source: PubMed Central journal article supplement (PMC5764801)
Supplement: NIHMS922193-supplement-4.pdf [file NIHMS922193-supplement-4.pdf]

**Supplementary Figure 2. Public Service Advertisement for Control Group**

BECOME  
LMini  
Wheats LABEL  
CONSCIOUS

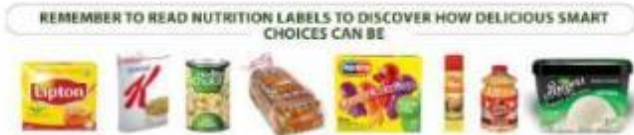

Internet survey of 1,247 adults, conducted June–July 2013.
