# Supplementary material
Source: PubMed Central journal article supplement (PMC5764801)
Supplement: NIHMS922193-supplement-5.pdf [file NIHMS922193-supplement-5.pdf]

**Supplementary Figure 3. Sample Product Comparison**

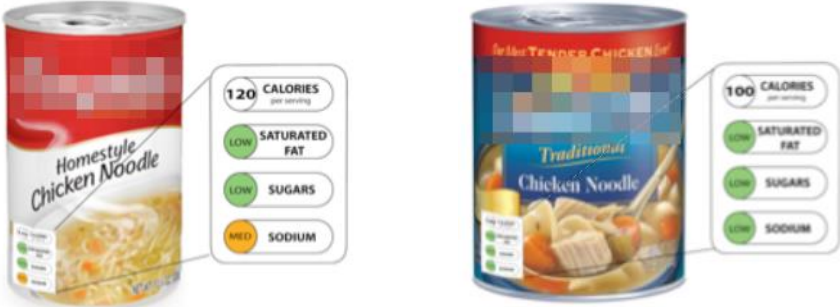

Internet survey of 1,247 adults, conducted June–July 2013.
